# Supplementary material for: Stigmatizing Monkeypox and COVID-19: A Comparative Framing Study of <em>the Washington Post</em>’s Online News
Source: Preprints.org preprint supplement (doi:10.20944/preprints202212.0415.v1), 2022-12-22
Supplement: Supplementary file 1 [file supplementary]

**Supplementary Materials**

Framing Analysis Codebook

**Framing Analysis Codebook for Monkeypox and COVD-19 Issues**

| **News Frame (Coding Value)** | **Operational Definition** | **Example** |
| --- | --- | --- |
| Endemic (1) | The health risk is a typical endemic disease within a country or region. | The monkeypox in Europe is rare as it was typically thought to spread in Africa in the past. |
| Sexual Transmission (2) | The health risk is caused by a specific sex. | Most of the confirmed cases are reported from intimate sex between males. |
| Reassurance (3) | There is no need to worry about health risks because it can be treated. | Sufficient and effective vaccines will be available, so there is no need to worry about it. |
| Panic (4) | The Health risk sparks widespread concern and fear. | The rapid spread and uncertainty of COVID-19 has sparked widespread concern. |
| Attribution of Responsibility (5) | The health risk is blamed for the specific individuals or groups. | The government should be responsible for the spread of the epidemic caused by late data disclosure. |
| Governance (6) | Governments take necessary policies or actions to deal with health risks. | The government took a series of effective lockdown measures to control the spread of the virus. |
| Science (7) | The health risk is objectively explained based on science. | The researchers measured and compared the viral gene sequences. |
